# Supplementary material for: Extensively hydrolysed casein formula supplemented with Lactobacillus rhamnosus GG maintains hypoallergenic status: randomised double-blind, placebo-controlled crossover trial
Source: PubMed Central journal article supplement — BMJ Open. 2012 Mar 5;2(2):e000637. doi: 10.1136/bmjopen-2011-000637 (PMC3298831; doi:10.1136/bmjopen-2011-000637), 2012-03-05
Supplement: bmjopen-2011-000637-s2.pdf [file bmjopen-2011-000637-s2.pdf]

**Enrollment**

**CONSORT 2010 Flow Diagram**

Assessed for eligibility (n=34)

Excluded (n=1)  
◆ Not meeting inclusion criteria (n=1)

Randomized, following a 7-day period of  
CMP elimination (n=33)

**Allocation - DBPCFC**

Allocated to both intervention (EHF-LGG) and control (EHF) in  
blinded, randomized order on Day 1 (n=33)  
◆ Received allocated intervention and control (n=33)

**Allocation - Open Challenge (OC)**

Allocated to intervention (EHF-LGG) on Day 1 or 2 (n=33)  
◆ Received allocated intervention (n=33)

**Allocation - Home feeding period**

Allocated to intervention (EHF-LGG) Days 2 to 9 (n=33)  
◆ Received allocated intervention (n=33)

**Follow-Up**

Lost to follow-up (n=0)  
Discontinued intervention (n=0)

**Analysis**

Analysed, participants with confirmed CMA (n=31)  
◆ Excluded from analysis (CAP RAST to CM was lower  
than the confirmatory value for CMA) (n=2)
